# Supplementary material
Source: PubMed Central journal article supplement (PMC4188984)

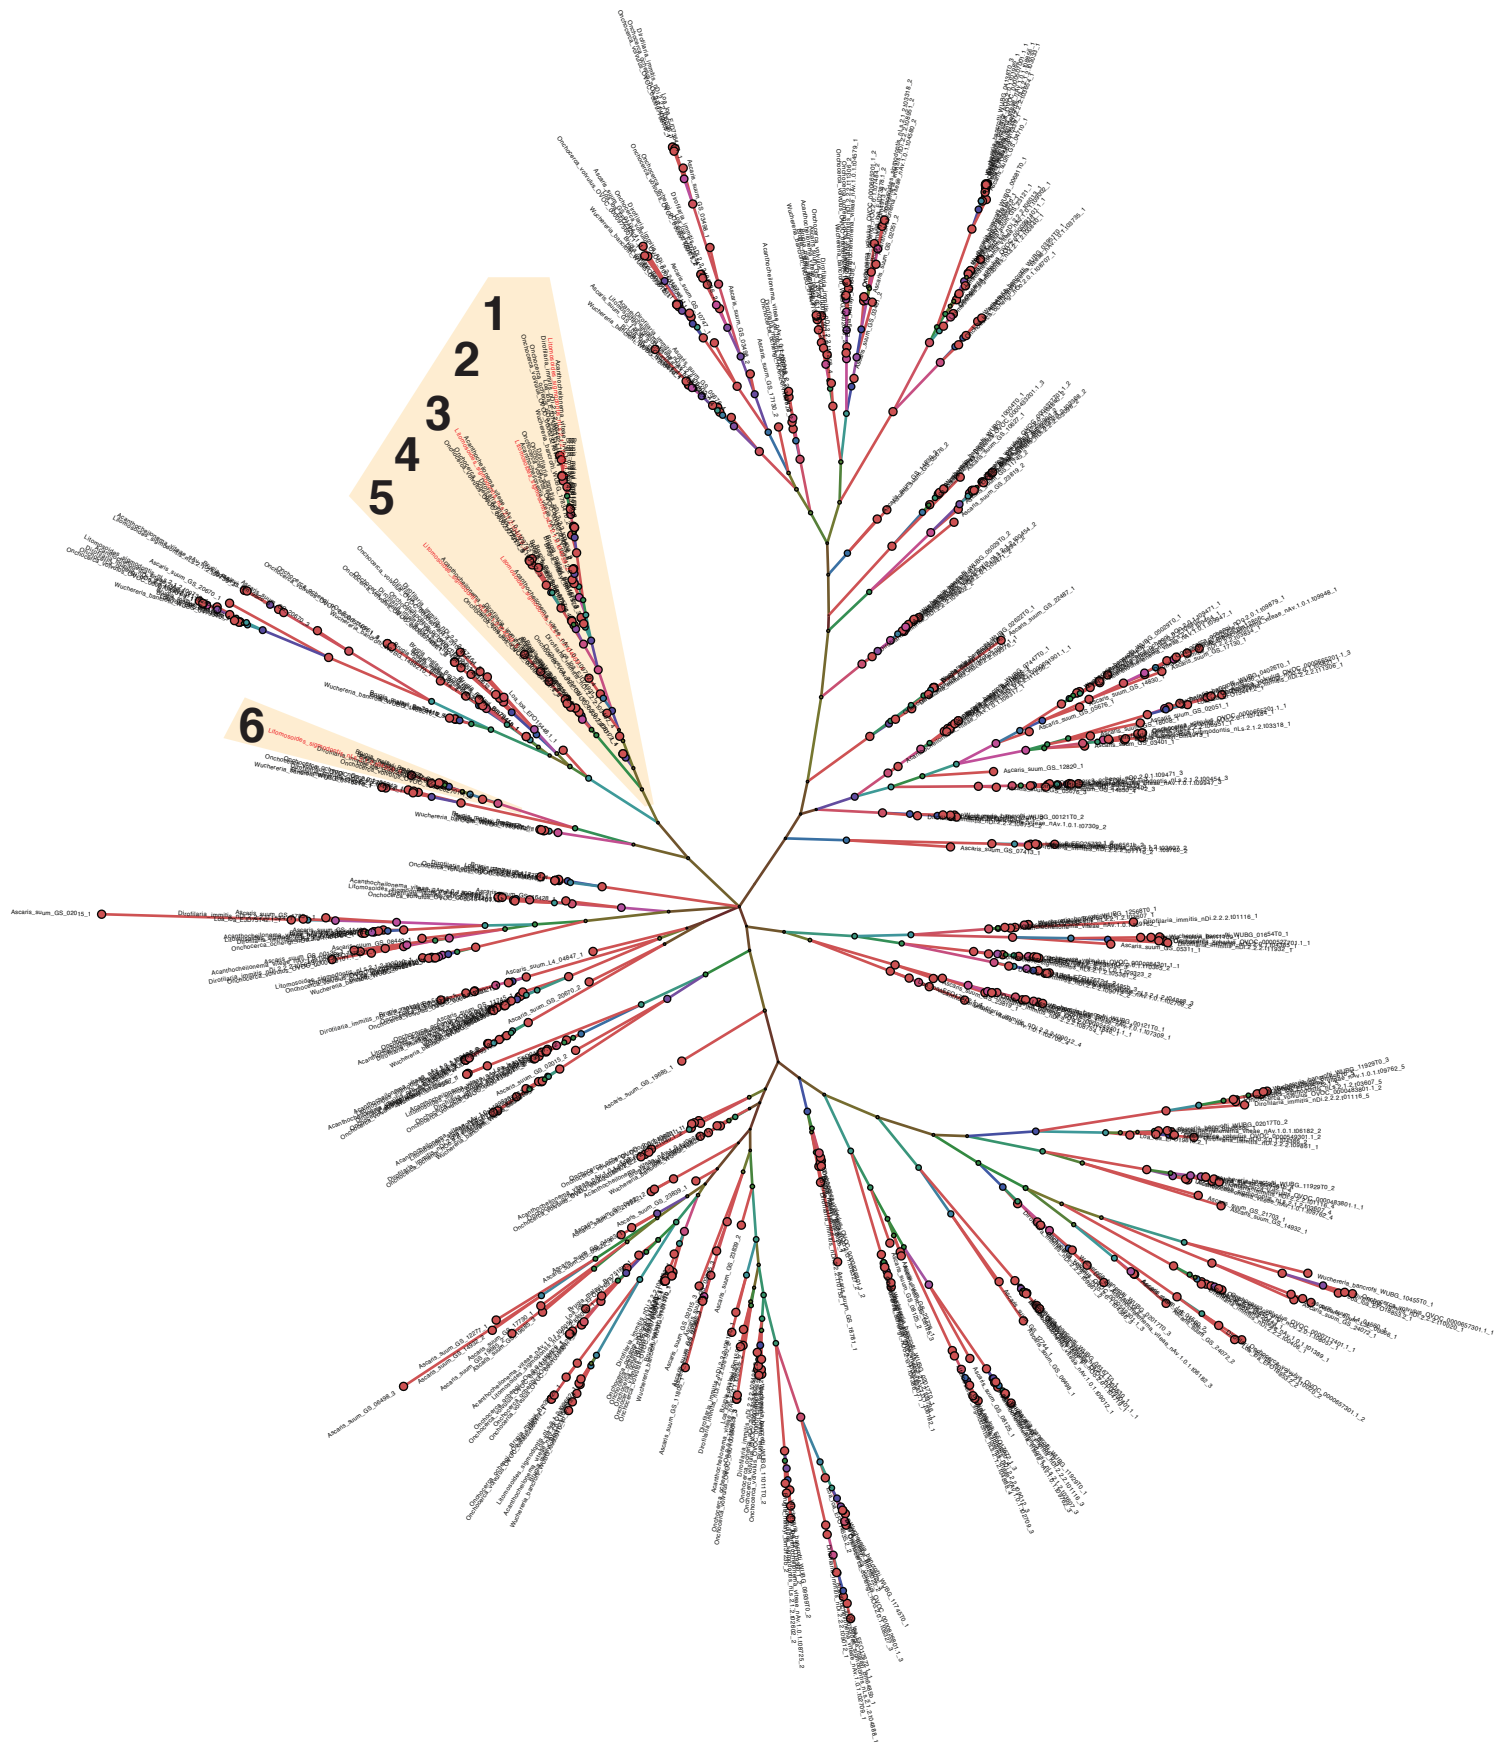

Supplement: supp_M114.038539_mcp.M114.038539-3.pdf [file supp_M114.038539_mcp.M114.038539-3.pdf]
